# Supplementary material for: Structural but Not Functional Alterations in Cones in the Absence of the Retinal Disease Protein Retinitis Pigmentosa 2 (RP2) in a Cone-Only Retina
Source: Front Genet. 2019 Apr 5;10:323. doi: 10.3389/fgene.2019.00323 (PMC6460013; doi:10.3389/fgene.2019.00323)
Supplement: TABLE S2 — Representative pathways that are altered in the Rp2-DKO mice. [file Table_2.XLS]

## Sheet: Sheet0
© 2000-2018 QIAGEN. All rights reserved.
Ingenuity Canonical Pathways	-log(p-value)	Molecules
Phagosome Formation	7.22	TLR2,Fcrls,CLEC7A,ITGAM,SYK,C3AR1,INPP5D,FCGR3A/FCGR3B,ITGAX
Granulocyte Adhesion and Diapedesis	6.01	CXCL10,ITGAM,CLDN23,CXCL13,CCL2,CCL3L3,Ccl2,CCL28,CCL5
Agranulocyte Adhesion and Diapedesis	4.84	CXCL10,CLDN23,CCL2,CXCL13,CCL3L3,CCL28,Ccl2,CCL5
Communication between Innate and Adaptive Immune Cells	4.74	CXCL10,TLR2,HLA-A,CCL3L3,CD86,CCL5
Fcγ Receptor-mediated Phagocytosis in Macrophages and Monocytes	4.71	PLD4,SYK,HCK,LCP2,INPP5D,FCGR3A/FCGR3B
Caveolar-mediated Endocytosis Signaling	4.24	ALB,ITGAM,HLA-A,ITGB4,ITGAX
Complement System	4.22	ITGAM,CFI,C3AR1,ITGAX
Neuroinflammation Signaling Pathway	3.28	CXCL10,TLR2,CCL2,HLA-A,SYK,CYBB,CD86,CCL5
Hepatic Fibrosis / Hepatic Stellate Cell Activation	3.12	COL8A2,CCL2,EDN1,TIMP1,CCL5,COL20A1
MSP-RON Signaling Pathway	3.11	TLR2,CSF2RB,ITGAM,CCL2
TREM1 Signaling	3.05	TLR2,CCL2,CD86,ITGAX
Role of Pattern Recognition Receptors in Recognition of Bacteria and Viruses	2.97	TLR2,CLEC7A,SYK,CCL5,C3AR1
Pathogenesis of Multiple Sclerosis	2.96	CXCL10,CCL5
GP6 Signaling Pathway	2.94	COL8A2,APBB1IP,SYK,COL20A1,LCP2
Altered T Cell and B Cell Signaling in Rheumatoid Arthritis	2.77	TLR2,CXCL13,HLA-A,CD86
Role of Hypercytokinemia/hyperchemokinemia in the Pathogenesis of Influenza	2.74	CXCL10,CCL2,CCL5
CTLA4 Signaling in Cytotoxic T Lymphocytes	2.62	HLA-A,SYK,CD86,LCP2
Differential Regulation of Cytokine Production in Macrophages and T Helper Cells by IL-17A and IL-17F	2.34	CCL2,CCL5
Role of NFAT in Regulation of the Immune Response	2.28	HLA-A,SYK,CD86,LCP2,FCGR3A/FCGR3B
Production of Nitric Oxide and Reactive Oxygen Species in Macrophages	2.26	TLR2,PON1,LYZ,ALB,CYBB
LXR/RXR Activation	2.23	PON1,LYZ,ALB,CCL2
Atherosclerosis Signaling	2.23	PON1,LYZ,ALB,CCL2
IL-8 Signaling	2.2	PLD4,ITGAM,CCND2,CYBB,ITGAX
Natural Killer Cell Signaling	2.17	SYK,INPP5D,LCP2,FCGR3A/FCGR3B
Differential Regulation of Cytokine Production in Intestinal Epithelial Cells by IL-17A and IL-17F	2.13	CCL2,CCL5
CD28 Signaling in T Helper Cells	2.12	HLA-A,SYK,CD86,LCP2
IL-17A Signaling in Gastric Cells	2.06	CXCL10,CCL5
Apelin Liver Signaling Pathway	2.03	EDN1,APLN
VDR/RXR Activation	2	CXCL10,CASR,CCL5
IL-12 Signaling and Production in Macrophages	1.99	TLR2,PON1,LYZ,ALB
Role of MAPK Signaling in the Pathogenesis of Influenza	1.97	CXCL10,CCL2,CCL5
Systemic Lupus Erythematosus Signaling	1.95	HLA-A,CD72,CD86,INPP5D,FCGR3A/FCGR3B
The Visual Cycle	1.86	LRAT,RPE65
Crosstalk between Dendritic Cells and Natural Killer Cells	1.84	CSF2RB,HLA-A,CD86
IL-17 Signaling	1.83	CXCL10,CCL2,TIMP1
B Cell Development	1.76	HLA-A,CD86
Interferon Signaling	1.76	MX1,ISG15
Dendritic Cell Maturation	1.6	TLR2,HLA-A,CD86,FCGR3A/FCGR3B
Role of IL-17F in Allergic Inflammatory Airway Diseases	1.56	CXCL10,CCL2
Paxillin Signaling	1.53	ITGAM,ITGB4,ITGAX
Clathrin-mediated Endocytosis Signaling	1.51	PON1,LYZ,ALB,ITGB4
Graft-versus-Host Disease Signaling	1.51	HLA-A,CD86
Autoimmune Thyroid Disease Signaling	1.48	HLA-A,CD86
Leukocyte Extravasation Signaling	1.46	ITGAM,CLDN23,TIMP1,CYBB
iCOS-iCOSL Signaling in T Helper Cells	1.45	HLA-A,LCP2,INPP5D
Integrin Signaling	1.45	ITGAM,ITGB4,ITGAX,CAPN3
Fc Epsilon RI Signaling	1.42	SYK,LCP2,INPP5D
Apelin Endothelial Signaling Pathway	1.41	CCL2,APLN,AQP2
Nur77 Signaling in T Lymphocytes	1.35	HLA-A,CD86
PI3K Signaling in B Lymphocytes	1.34	CD180,SYK,INPP5D
Activation of IRF by Cytosolic Pattern Recognition Receptors	1.31	ZBP1,ISG15
Phagosome Maturation	1.24	CTSS,HLA-A,CYBB
Role of IL-17A in Arthritis	1.22	CCL2,CCL5
T Helper Cell Differentiation	1.19	HLA-A,CD86
PKCθ Signaling in T Lymphocytes	1.15	HLA-A,CD86,LCP2
Apelin Adipocyte Signaling Pathway	1.13	APLN,CYBB
GM-CSF Signaling	1.13	CSF2RB,HCK
Chemokine Signaling	1.12	CCL2,CCL5
Allograft Rejection Signaling	1.06	HLA-A,CD86
eNOS Signaling	1.06	MIP,AQP2,NOSTRIN
FcγRIIB Signaling in B Lymphocytes	1.05	SYK,INPP5D
IL-3 Signaling	1.05	CSF2RB,INPP5D
GADD45 Signaling	0.991	CCND2
IL-4 Signaling	0.991	HLA-A,INPP5D
B Cell Receptor Signaling	0.991	APBB1IP,SYK,INPP5D
Granzyme A Signaling	0.971	Hist1h1e
Apelin Muscle Signaling Pathway	0.951	APLN
Role of Macrophages, Fibroblasts and Endothelial Cells in Rheumatoid Arthritis	0.947	TLR2,CCL2,CCL5,FCGR3A/FCGR3B
Choline Biosynthesis III	0.932	PLD4
Apelin Cardiac Fibroblast Signaling Pathway	0.932	APLN
D-myo-inositol (1,4,5)-trisphosphate Degradation	0.914	INPP5D
Role of Lipids/Lipid Rafts in the Pathogenesis of Influenza	0.896	RSAD2
Type I Diabetes Mellitus Signaling	0.883	HLA-A,CD86
D-myo-inositol (1,3,4)-trisphosphate Biosynthesis	0.879	INPP5D
Antioxidant Action of Vitamin C	0.87	PLD4,CSF2RB
Gαs Signaling	0.87	GLP1R,HCK
1D-myo-inositol Hexakisphosphate Biosynthesis II (Mammalian)	0.851	INPP5D
Virus Entry via Endocytic Pathways	0.824	HLA-A,ITGB4
Neuroprotective Role of THOP1 in Alzheimer's Disease	0.801	HLA-A,SERPINA3
Cytotoxic T Lymphocyte-mediated Apoptosis of Target Cells	0.783	HLA-A
Superpathway of D-myo-inositol (1,4,5)-trisphosphate Metabolism	0.77	INPP5D
Phospholipase C Signaling	0.767	PLD4,SYK,LCP2
Th1 Pathway	0.75	HLA-A,CD86
IL-17A Signaling in Fibroblasts	0.747	CCL2
FXR/RXR Activation	0.745	PON1,ALB
Renin-Angiotensin Signaling	0.745	CCL2,CCL5
Superpathway of Inositol Phosphate Compounds	0.74	PLD4,CD86,INPP5D
D-myo-inositol (1,4,5)-Trisphosphate Biosynthesis	0.726	PLD4
Protein Ubiquitination Pathway	0.714	CRYAB,HLA-A,CRYAA/CRYAA2
Antigen Presentation Pathway	0.714	HLA-A
Inhibition of Matrix Metalloproteases	0.695	TIMP1
Th2 Pathway	0.686	HLA-A,CD86
IL-9 Signaling	0.65	BCL3
nNOS Signaling in Skeletal Muscle Cells	0.64	CAPN3
Retinol Biosynthesis	0.602	LRAT
nNOS Signaling in Neurons	0.595	CAPN3
Amyloid Processing	0.595	CAPN3
Acute Phase Response Signaling	0.578	ALB,SERPINA3
Aldosterone Signaling in Epithelial Cells	0.578	CRYAB,CRYAA/CRYAA2
Apelin Pancreas Signaling Pathway	0.554	APLN
Th1 and Th2 Activation Pathway	0.551	HLA-A,CD86
Triacylglycerol Degradation	0.542	RPE65
Phototransduction Pathway	0.536	RGR
Regulation of Cellular Mechanics by Calpain Protease	0.519	CAPN3
RAR Activation	0.517	CSF2RB,LRAT
Mitotic Roles of Polo-Like Kinase	0.507	FBXO5
autophagy	0.507	CTSS
Cell Cycle: G1/S Checkpoint Regulation	0.502	CCND2
Glucocorticoid Receptor Signaling	0.5	KRT12,CCL2,CCL5
Calcium-induced T Lymphocyte Apoptosis	0.487	HLA-A
Endothelin-1 Signaling	0.478	PLD4,EDN1
Phospholipases	0.476	PLD4
IL-2 Signaling	0.476	SYK
Hypoxia Signaling in the Cardiovascular System	0.462	EDN1
Osteoarthritis Pathway	0.457	TLR2,CASR
Glioma Invasiveness Signaling	0.452	TIMP1
Role of JAK1 and JAK3 in γc Cytokine Signaling	0.452	SYK
Toll-like Receptor Signaling	0.452	TLR2
Role of PI3K/AKT Signaling in the Pathogenesis of Influenza	0.435	CCL5
Cyclins and Cell Cycle Regulation	0.435	CCND2
GPCR-Mediated Integration of Enteroendocrine Signaling Exemplified by an L Cell	0.435	GLP1R
IL-15 Signaling	0.427	SYK
Heparan Sulfate Biosynthesis (Late Stages)	0.419	RPE65
Macropinocytosis Signaling	0.411	ITGB4
OX40 Signaling Pathway	0.396	HLA-A
Reelin Signaling in Neurons	0.393	HCK
FLT3 Signaling in Hematopoietic Progenitor Cells	0.388	INPP5D
HER-2 Signaling in Breast Cancer	0.385	ITGB4
Heparan Sulfate Biosynthesis	0.378	RPE65
Apoptosis Signaling	0.378	CAPN3
CCR5 Signaling in Macrophages	0.365	CCL5
Acute Myeloid Leukemia Signaling	0.362	CSF2RB
PDGF Signaling	0.359	INPP5D
STAT3 Pathway	0.353	CSF2RB
TR/RXR Activation	0.35	BCL3
FAK Signaling	0.34	CAPN3
p53 Signaling	0.332	CCND2
Apelin Cardiomyocyte Signaling Pathway	0.312	APLN
GPCR-Mediated Nutrient Sensing in Enteroendocrine Cells	0.31	CASR
Amyotrophic Lateral Sclerosis Signaling	0.308	CAPN3
T Cell Receptor Signaling	0.308	LCP2
Pancreatic Adenocarcinoma Signaling	0.303	PLD4
HIF1α Signaling	0.293	EDN1
Rac Signaling	0.293	CYBB
PTEN Signaling	0.293	INPP5D
Role of Tissue Factor in Cancer	0.279	HCK
PI3K/AKT Signaling	0.272	INPP5D
fMLP Signaling in Neutrophils	0.271	CYBB
HMGB1 Signaling	0.264	CCL2
p70S6K Signaling	0.254	SYK
Aryl Hydrocarbon Receptor Signaling	0.246	CCND2
Ovarian Cancer Signaling	0.241	EDN1
Insulin Receptor Signaling	0.239	INPP5D
Endocannabinoid Cancer Inhibition Pathway	0.218	CCND2
3-phosphoinositide Degradation	0.217	INPP5D
Tight Junction Signaling	0.214	CLDN23
Cdc42 Signaling	0.21	HLA-A
D-myo-inositol-5-phosphate Metabolism	0.21	PLD4
Gαq Signaling	0.21	PLD4
Tec Kinase Signaling	0.205	HCK
